# Supplementary material
Source: PubMed Central journal article supplement (PMC3340272)
Supplement: supp_M112.340570_jbc.M112.340570-1.pdf [file supp_M112.340570_jbc.M112.340570-1.pdf]

**Supplemental table 1.** Primer sequences used for RT-PCR analysis

| Gene name     | Access number                                | PCR product size (nucleotides) | Primer sequence                                                   |
|---------------|----------------------------------------------|--------------------------------|-------------------------------------------------------------------|
| ANG           | NM_001145<br>( <i>Homo sapiens</i> )         | 191                            | F 5'-tgtcctgccggttctgcgg-3'<br>R 5'-ccggcctgtggttgcat-3'          |
| ATF6          | NM_007348<br>( <i>Homo sapiens</i> )         | 232                            | F 5'-ccagcagcacccaagactcaaaca-3'<br>R 5'-gtgtgactccccagcaacagc-3' |
| bFGF          | NM_002006<br>( <i>Homo sapiens</i> )         | 221                            | F 5'-agcgacctcatcaag-3'<br>R 5'-cgttcagtgccacatacc-3'             |
| CHOP          | NM_004083<br>( <i>Homo sapiens</i> )         | 170                            | F 5'-tggaagcctggtatgaggac-3'<br>R 5'-tgtgacctctgctggttctg-3'      |
| GLUT1         | NM_006516<br>( <i>Homo sapiens</i> )         | 291                            | F 5'-gctacaacactggagtcatc-3'<br>R 5'-ggatcagcatctcaaaggac-3'      |
| GRP78         | NM_005347<br>( <i>Homo sapiens</i> )         | 200                            | F 5'-ggtgaaagaccccagacaaa-3'<br>R 5'-gtcaggcgattctggtcatt-3'      |
| IRE1 $\alpha$ | NM_001433<br>( <i>Homo sapiens</i> )         | 237                            | F 5'-agagaggcgggagagccgtg-3'<br>R 5'-cgaggagggtggggaaagcga-3'     |
| PDGF-B        | NM_002608<br>( <i>Homo sapiens</i> )         | 116                            | F 5'-ccgccagcgcccattttca-3'<br>R 5'-ctttcagcgaggctggaggg-3'       |
| PERK          | NM_004836<br>( <i>Homo sapiens</i> )         | 175                            | F 5'-caggcaaggaaggagtctg-3'<br>R 5'-aacaactcaaagccaccac-3'        |
| PFKFB3        | NM_004566<br>( <i>Homo sapiens</i> )         | 253                            | F 5'-ggtgtgcgacgaccctac-3'<br>R 5'-gtacacgatcggcctctg-3'          |
| RPL13A        | NM_012423<br>( <i>Homo sapiens</i> )         | 124                            | F 5'-cctggaggagaagaggaaagaga-3'<br>R 5'-gaggacctctgtgtattgtcaa-3' |
| VEGF-A        | NM_001171623<br>( <i>Homo sapiens</i> )      | 144                            | F 5'-gaaggaggagggcagaatc-3'<br>R 5'-cacacaggatggcttgaag-3'        |
| sXBP1         | NM_005080<br>( <i>Homo sapiens</i> )         | 117                            | F 5'-gcaggtgcaggcccagttgt-3'<br>R 5'-tgggtccaagttgtccagaatgc-3'   |
| ATF4          | NM_024403<br>( <i>Rattus norvegicus</i> )    | 206                            | F 5'-acagcgaagtgttggcgggg-3'<br>R 5'-ggcatcctcctgccggtgt-3'       |
| CHOP          | NM_024134<br>( <i>Rattus norvegicus</i> )    | 236                            | F 5'-cgacagagccaaaataacagc-3'<br>R 5'-ggatgcagggtcaagagtgtg-3'    |
| HERP          | NM_053523<br>( <i>Rattus norvegicus</i> )    | 110                            | F 5'-agaactgcggatgaatgc-3'<br>R 5'-gaggaaaacggaaaatgtcg-3'        |
| PDI           | NM_012998<br>( <i>Rattus norvegicus</i> )    | 206                            | F 5'-tgaactggctgaagaaacg-3'<br>R 5'-ggaaaacacatcgctattgg-3'       |
| sXBP1         | NM_001004210<br>( <i>Rattus norvegicus</i> ) | 158                            | F 5'-ctgagtccgcagcaggtgcag-3'<br>R 5'-ctctgggaaggacatttga-3'      |

**Supplemental table 2.** Primary antibodies used for Western blot.

| <b>Antibody</b>                             | <b>Dilution</b> | <b>Reference</b>       |
|---------------------------------------------|-----------------|------------------------|
| <b>Anti-<math>\beta</math> Actin</b>        | 1:1000          | A2668 <sup>1</sup>     |
| <b>Anti-Angiogenin</b>                      | 1 :500          | sc-9044 <sup>2</sup>   |
| <b>Anti-ATF6</b>                            | 4 $\mu$ g/ml    | IMG-273 <sup>3</sup>   |
| <b>Anti-bFGF</b>                            | 1:500           | 05-118 <sup>4</sup>    |
| <b>Anti-eIF2<math>\alpha</math></b>         | 1 :1000         | ab5369 <sup>5</sup>    |
| <b>Anti-phospho-eIF2<math>\alpha</math></b> | 1:500           | ab32157 <sup>5</sup>   |
| <b>Anti-GRP78</b>                           | 1:1000          | sc-1050 <sup>2</sup>   |
| <b>Anti-HIF-1<math>\alpha</math></b>        | 1:500           | NB100-449 <sup>6</sup> |
| <b>Anti-IRE1<math>\alpha</math></b>         | 1:500           | 3294 <sup>7</sup>      |
| <b>Anti-PERK</b>                            | 1:500           | 3192 <sup>7</sup>      |
| <b>Anti-VEGFA</b>                           | 1:500           | sc-152 <sup>2</sup>    |

<sup>1</sup> Sigma-Aldrich

<sup>2</sup> Santa Cruz Biotechnology

<sup>3</sup> Imgenex

<sup>4</sup> Millipore

<sup>5</sup> Abcam

<sup>6</sup> Novus Biologicals

<sup>7</sup> Cell Signaling Technology

## Supplemental Figure 1

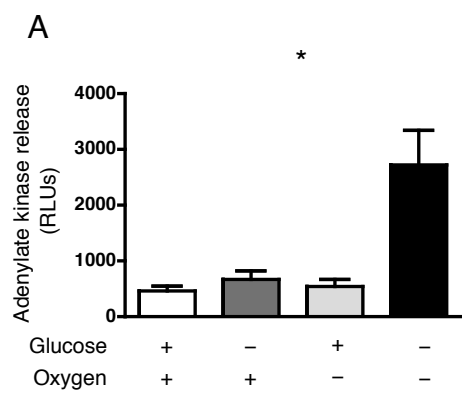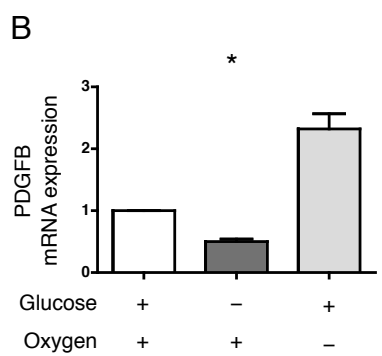

**C**

| Standard PDGF-BB concentration (pg/ml) | Corresponding optical density | Conditions (n=4)          | Optical density (mean±se) | Corresponding concentration |
|----------------------------------------|-------------------------------|---------------------------|---------------------------|-----------------------------|
| 0                                      | 0.04                          | Glucose (+)<br>Oxygen (+) | 0.03±0.004                | <Min                        |
| 31.2                                   | 0.07                          | Glucose (-)<br>Oxygen (+) | 0.03±0.001                | <Min                        |
| 62.5                                   | 0.11                          | Glucose (+)<br>Oxygen (-) | 0.03±0.001                | <Min                        |
| 125                                    | 0.19                          | Glucose (-)<br>Oxygen (-) | 0.03±0.006                | <Min                        |
| 250                                    | 0.34                          |                           |                           |                             |
| 500                                    | 0.63                          |                           |                           |                             |
| 1000                                   | 1.33                          |                           |                           |                             |
| 2000                                   | 2.45                          |                           |                           |                             |

## Supplemental Figure 2

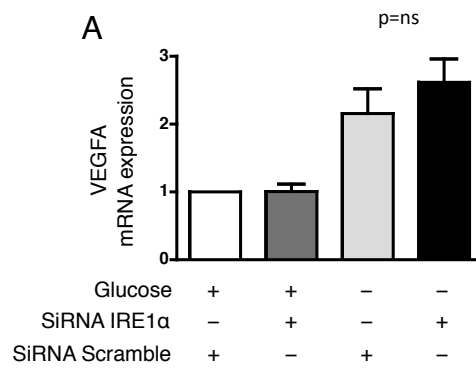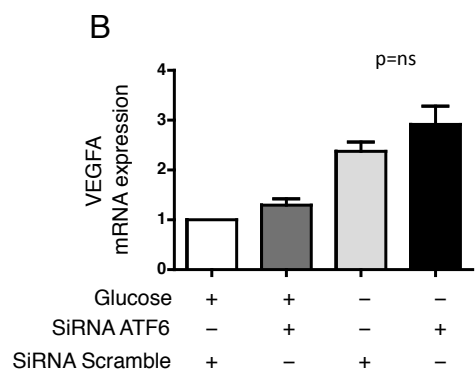

### Supplemental Figure 3

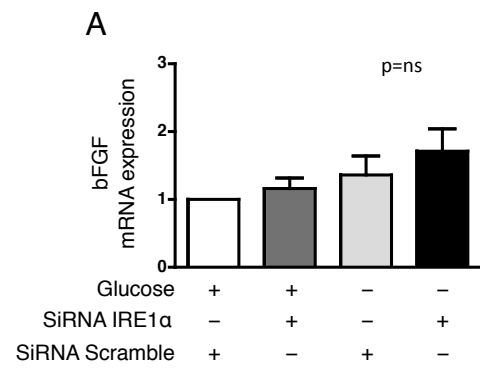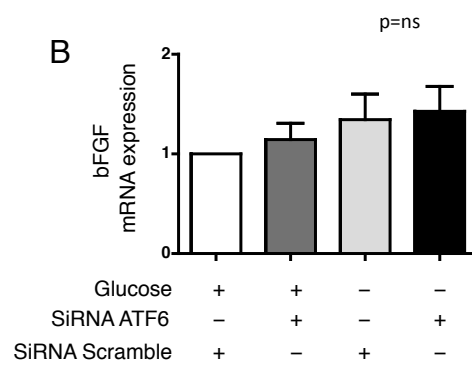

## Supplemental Figure 4

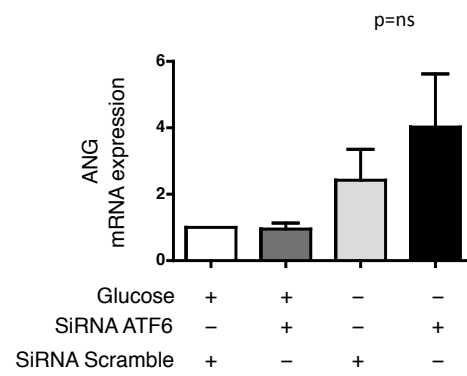

## SUPPLEMENTAL FIGURES LEGENDS

**SUPPLEMENTAL FIGURE 1.** A. HREC were cultured in glucose-deprived or standard medium with or without hypoxia for 24 hours. The level of cell death was evaluated by measuring the release of adenylate kinase with the ToxiLight<sup>®</sup> BioAssay Kit. Adenylate kinase concentrations were estimated by the luminescence of the medium and are presented as the mean  $\pm$  sem of three independent experiments. B. HREC were cultured in glucose-deprived medium or in standard medium with or without hypoxia for 24 hours. *PDGFB* transcript levels were measured by qRT-PCR and are presented as the mean $\pm$ sem relative to levels after 24 hours of culture with standard conditions in four independent experiments. \*,  $p<0.05$ . C. The secretion of PDGF-BB in the medium was quantified by ELISA. The concentration is presented as the mean $\pm$ sem of four independent experiments. \*,  $p<0.05$ .

**SUPPLEMENTAL FIGURE 2.** A. HREC were transfected with siRNAs targeting *IRE1 $\alpha$*  or control, non-targeted (scramble) siRNAs. A. *VEGFA* transcript levels were measured by qRT-PCR after the cells had incubated in glucose-free medium for 24 hours and compared to levels after 24 hours of culture with standard conditions (n=4). B. HREC were transfected with siRNAs targeting *ATF6* or control, non-targeted (scramble) siRNAs. *VEGFA* transcript levels were measured by qRT-PCR after the cells had incubated in glucose-free medium for 48 hours and compared to levels after 48 hours of culture with standard conditions (n=4).

**SUPPLEMENTAL FIGURE 3.** A. HREC were transfected with siRNAs targeting *IRE1 $\alpha$*  or control, non-targeted (scramble) siRNAs. *bFGF* transcript levels were measured by qRT-PCR after the cells had incubated in glucose-free medium for 24 hours and compared to levels after 24 hours of culture with standard conditions (n=4). B. HREC were transfected with siRNAs targeting *ATF6* or control, non-targeted (scramble) siRNAs. *bFGF* transcript levels were measured by qRT-PCR after the cells had incubated in glucose-free medium for 24 hours and compared to levels after 24 hours of culture with standard conditions (n=4).

**SUPPLEMENTAL FIGURE 4.** HREC were transfected with siRNAs targeting *ATF6* or with control, non-targeted (scramble) siRNAs. *ANG* transcript levels were measured by qRT-PCR after the cells had incubated in glucose-free medium for 24 hours and compared to levels after 24 hours of culture with standard conditions (n=4).
